## FORMAL COMMENT

# A response to “Realism and robustness require increased sample size when studying both sexes”

Benjamin Phillips<sup>1</sup>, Timo N. Haschler<sup>2</sup>, Natasha A. Karp<sup>1\*</sup>

**1** Data Sciences & Quantitative Biology, Discovery Sciences, R&D, AstraZeneca, Cambridge, United Kingdom, **2** Bioscience Renal, Research and Early Development Cardiovascular, Renal and Metabolism, Biopharmaceutical R&D, AstraZeneca, Cambridge, United Kingdom

\* [natasha.karp@astrazeneca.com](mailto:natasha.karp@astrazeneca.com)

In our original paper [1], we concluded that inclusion of both sexes does not require an increase in sample size by default. Drobnik and colleagues [2] have helpfully highlighted an exception to this general rule, in cases where the variability for a trait differs between the sexes. In these situations, the statistical analysis needs amending to account for the unequal variance and there is a potential power penalty [2]. We would argue however that the general rule still applies, unless there is empirical evidence on a case-by-case basis that suggests that a more complex bespoke power calculation is required, which can then guide the subsequent required sample size.

Drobnik and colleagues [2] assert that “heteroscedasticity between two sexes should be the norm rather than the exception” and provide 2 arguments for this position. Firstly, they cite 2 meta-analyses. We note that the conclusions, within these papers, do not support the default assumption of heteroscedasticity. Indeed, the opposite position (assumption of homoscedasticity) is better supported. For example: “For the average trait of interest to animal researchers, variability does not differ between males and unstaged females” [3] and “the distributions (*diff in CV*) [explanation added] were extremely leptokurtic, so that many differences were close to 0” [4]. Furthermore, additional studies, be it clinical data [5], behaviour metrics [6], microarray data [7], or data from rats [8] have found similar results. In summary, the literature supports the position that unless there is evidence to the contrary, assume equal variance.

Secondly, Drobnik and colleagues [2] argue that the variance between the sexes will inevitably differ due to Taylor’s law, where the mean and the standard deviation correlate. Consequently, baseline sex differences will inherently lead to variance differences. It is important to note that, for traits that follow Taylor’s law, then any intervention effect (e.g., drug treatment) will also lead to a change in variance between treatment groups. In these situations, it would be inappropriate to fit a standard factorial analysis and the associated statistical power would be irrelevant. As we stated in our original paper [1], it is important to ensure the assumptions hold for your chosen statistical analysis. In biological situations where the mean and variance correlate, a variance stabilising transformation (e.g., log) is an easy applicable strategy to try which should improve the characteristics and allows the application of a standard statistical strategy.

In conclusion, we believe that our original advice still holds. If you have no specific knowledge to the contrary, it is reasonable to proceed assuming homoscedasticity, with no need to increase the overall sample size. If evidence of sex-related heteroscedasticity in the measure of interest is apparent or later emerges, it is important to adapt the statistical analysis plan and

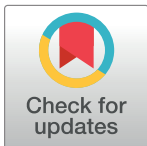

## OPEN ACCESS

**Citation:** Phillips B, Haschler TN, Karp NA (2024) A response to “Realism and robustness require increased sample size when studying both sexes”. *PLoS Biol* 22(4): e3002578. <https://doi.org/10.1371/journal.pbio.3002578>

**Received:** January 19, 2024

**Accepted:** March 5, 2024

**Published:** April 12, 2024

**Copyright:** © 2024 Phillips et al. This is an open access article distributed under the terms of the [Creative Commons Attribution License](https://creativecommons.org/licenses/by/4.0/), which permits unrestricted use, distribution, and reproduction in any medium, provided the original author and source are credited.

**Funding:** The author(s) received no specific funding for this work.

**Competing interests:** I have read the journal’s policy and the authors of this manuscript have the following competing interests: BP, NAK and TMH are employees and shareholders of AstraZeneca.

power calculation accordingly. As inclusion of both sexes increases, we will start to have the data to conduct more nuanced planning.

## References

1. Phillips B, Haschler TN, Karp NA. Statistical simulations show that scientists need not increase overall sample size by default when including both sexes in in vivo studies. *PLoS Biol.* 2023; 21(6):e3002129. <https://doi.org/10.1371/journal.pbio.3002129> PMID: 37289836
2. Drobniak SM, Malgorzata Lagisz M, Yang Y, Nakagawa S. Realism and robustness require increased sample size when studying both sexes. *PLoS Biol.* 2024; 22(4): e3002578. <https://doi.org/10.1371/journal.pbio.3002578>
3. Prendergast BJ, Onishi KG, Zucker I. Female mice liberated for inclusion in neuroscience and biomedical research. *Neurosci Biobehav Rev.* 2014; 40:1–5. <https://doi.org/10.1016/j.neubiorev.2014.01.001> PMID: 24456941
4. Wyman MJ, Rowe L. Male bias in distributions of additive genetic, residual, and phenotypic variances of shared traits. *Am Nat.* 2014; 184(3):326–337. <https://doi.org/10.1086/677310> PMID: 25141142
5. Halsey LG, Esteves GP, Dolan E. Variability in variability: does variation in morphological and physiological traits differ between men and women? *R Soc Open Sci.* 2023; 10(9):230713. <https://doi.org/10.1098/rsos.230713> PMID: 37680495
6. Kaluve AM, Le JT, Graham BM. Female rodents are not more variable than male rodents: A meta-analysis of preclinical studies of fear and anxiety. *Neurosci Biobehav Rev.* 2022:104962. <https://doi.org/10.1016/j.neubiorev.2022.104962> PMID: 36402227
7. Itoh Y, Arnold AP. Are females more variable than males in gene expression? Meta-analysis of microarray datasets. *Biol Sex Differ.* 2015; 6:18. <https://doi.org/10.1186/s13293-015-0036-8> PMID: 26557976
8. Becker JB, Prendergast BJ, Liang JW. Female rats are not more variable than male rats: a meta-analysis of neuroscience studies. *Biol Sex Differ.* 2016; 7(1):1–7.
